# Supplementary material for: Ground state instabilities of protein shells are eliminated by buckling
Source: Royal Society of Chemistry journal article supplement (doi:10.1039/c7sm01184a), 2017-01-01
Supplement: c7sm01184a1.pdf [file c7sm01184a1.pdf]

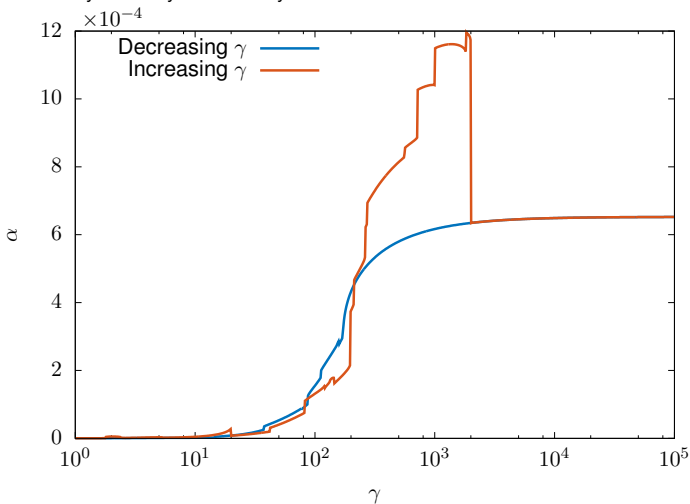

**Figure:** Asphericity  $\alpha = \frac{\langle (R-R_0)^2 \rangle}{R_0^2}$  versus FvK number  $\gamma$  for  $N = 72$  particles and  $\delta = 0.04$ . Symmetry transitions are present in all intervals of FvK number.
